# Supplementary material for: Label-free quantitative proteomics analysis of jujube (Ziziphus jujubaMill.) during different growth stages
Source: Royal Society of Chemistry journal article supplement (doi:10.1039/d1ra02989d), 2021-01-01
Supplement: d1ra02989d1.pdf [file d1ra02989d1.pdf]

Electronic Supplementary Material (ESI) for RSC Advances.

Supplementary Fig.1 KEGG pathway mapping of amino sugar and nucleotide sugar metabolism

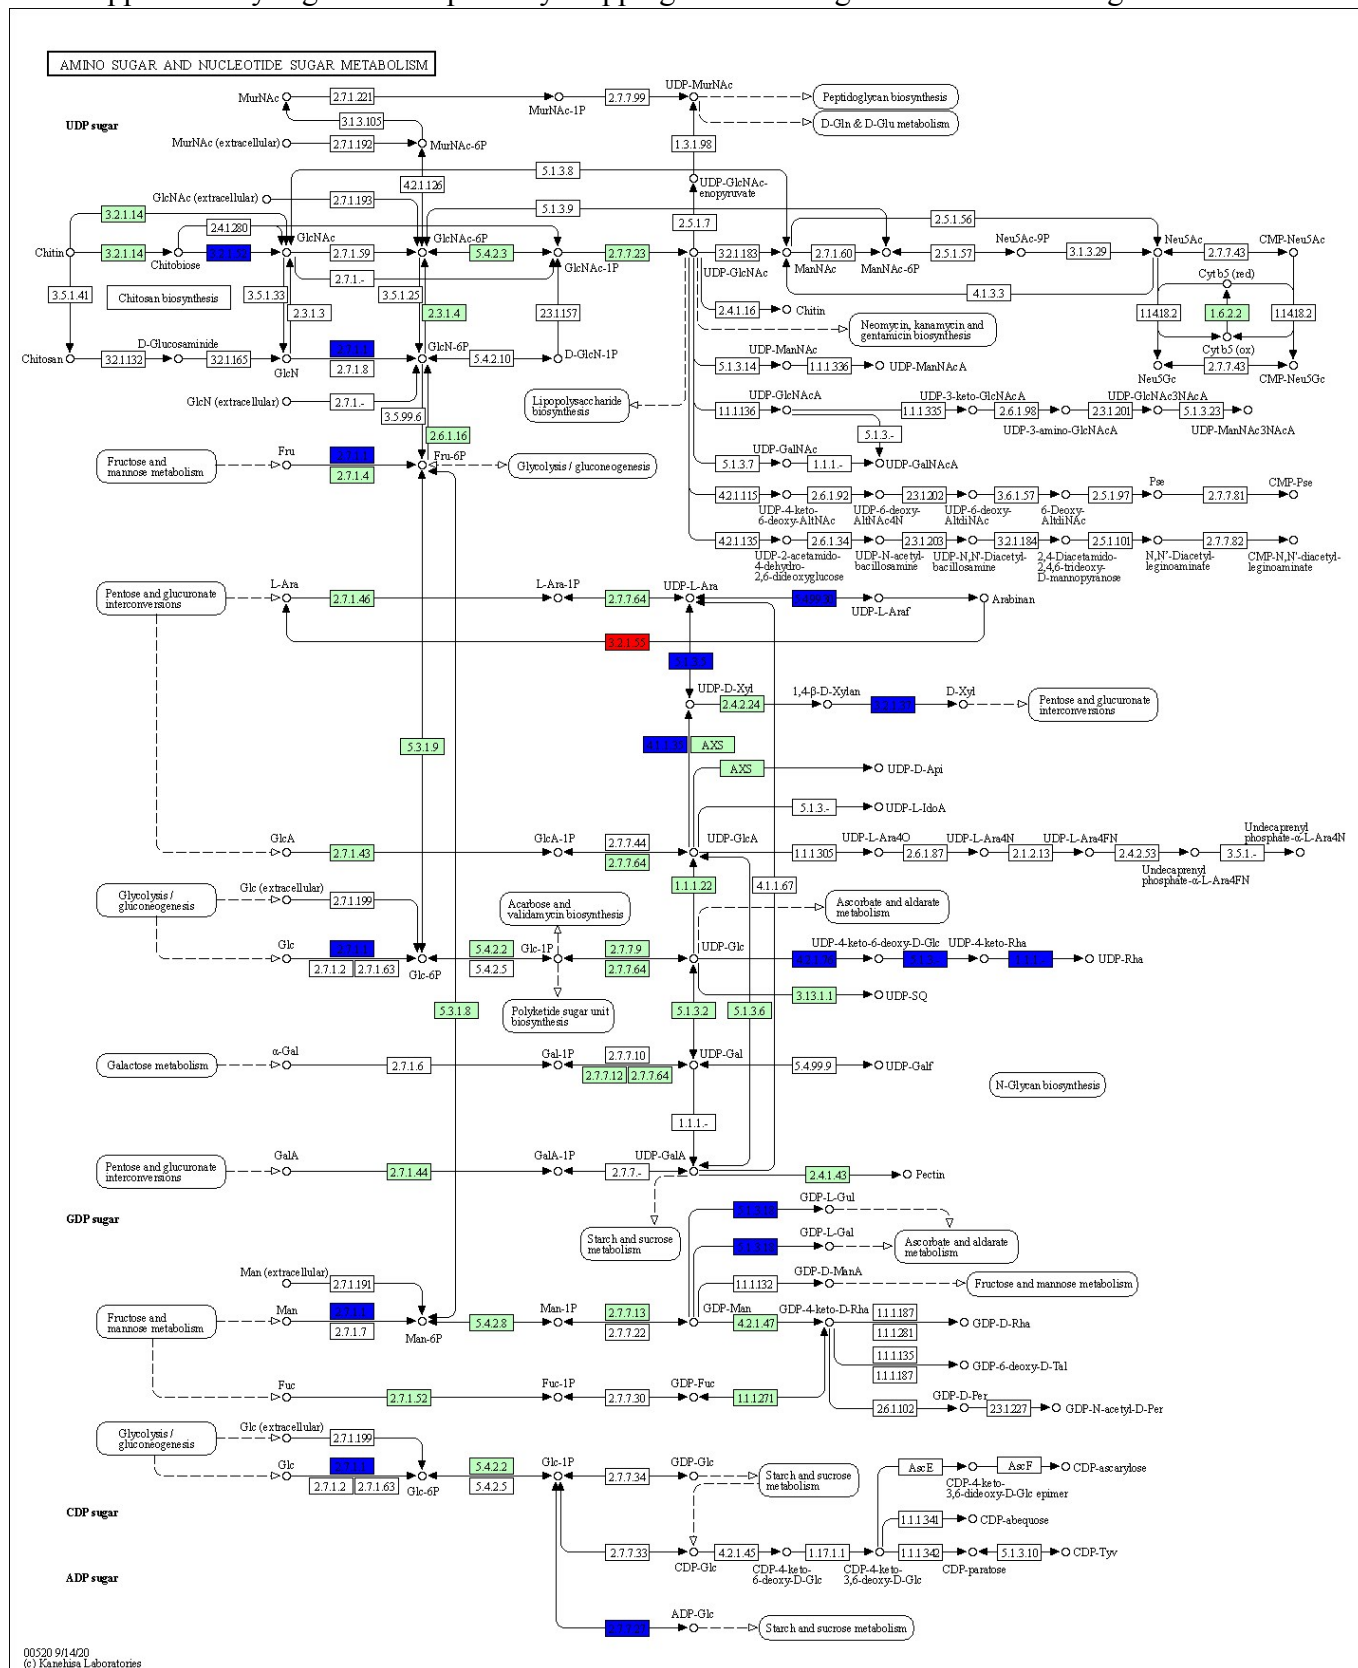

Box means gene or enzyme, and circle means chemical compound. Red represents up-regulation, while blue represents down-regulation. Green means particular gene or enzyme in this species.

Supplementary Fig.2 KEGG pathway mapping of ascorbate and aldarate metabolism

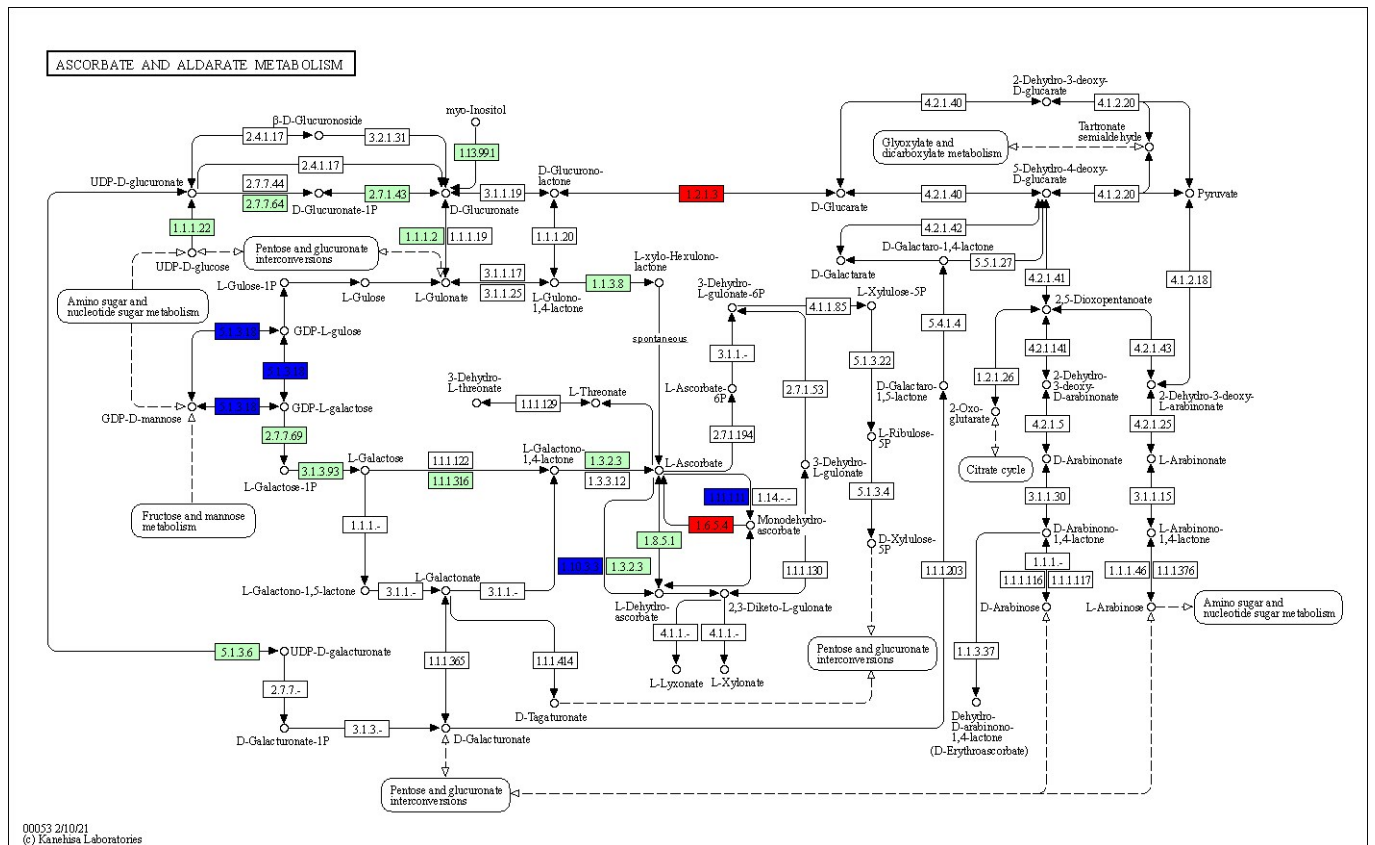

Supplementary Fig.3 KEGG pathway mapping of fatty acid biosynthesis

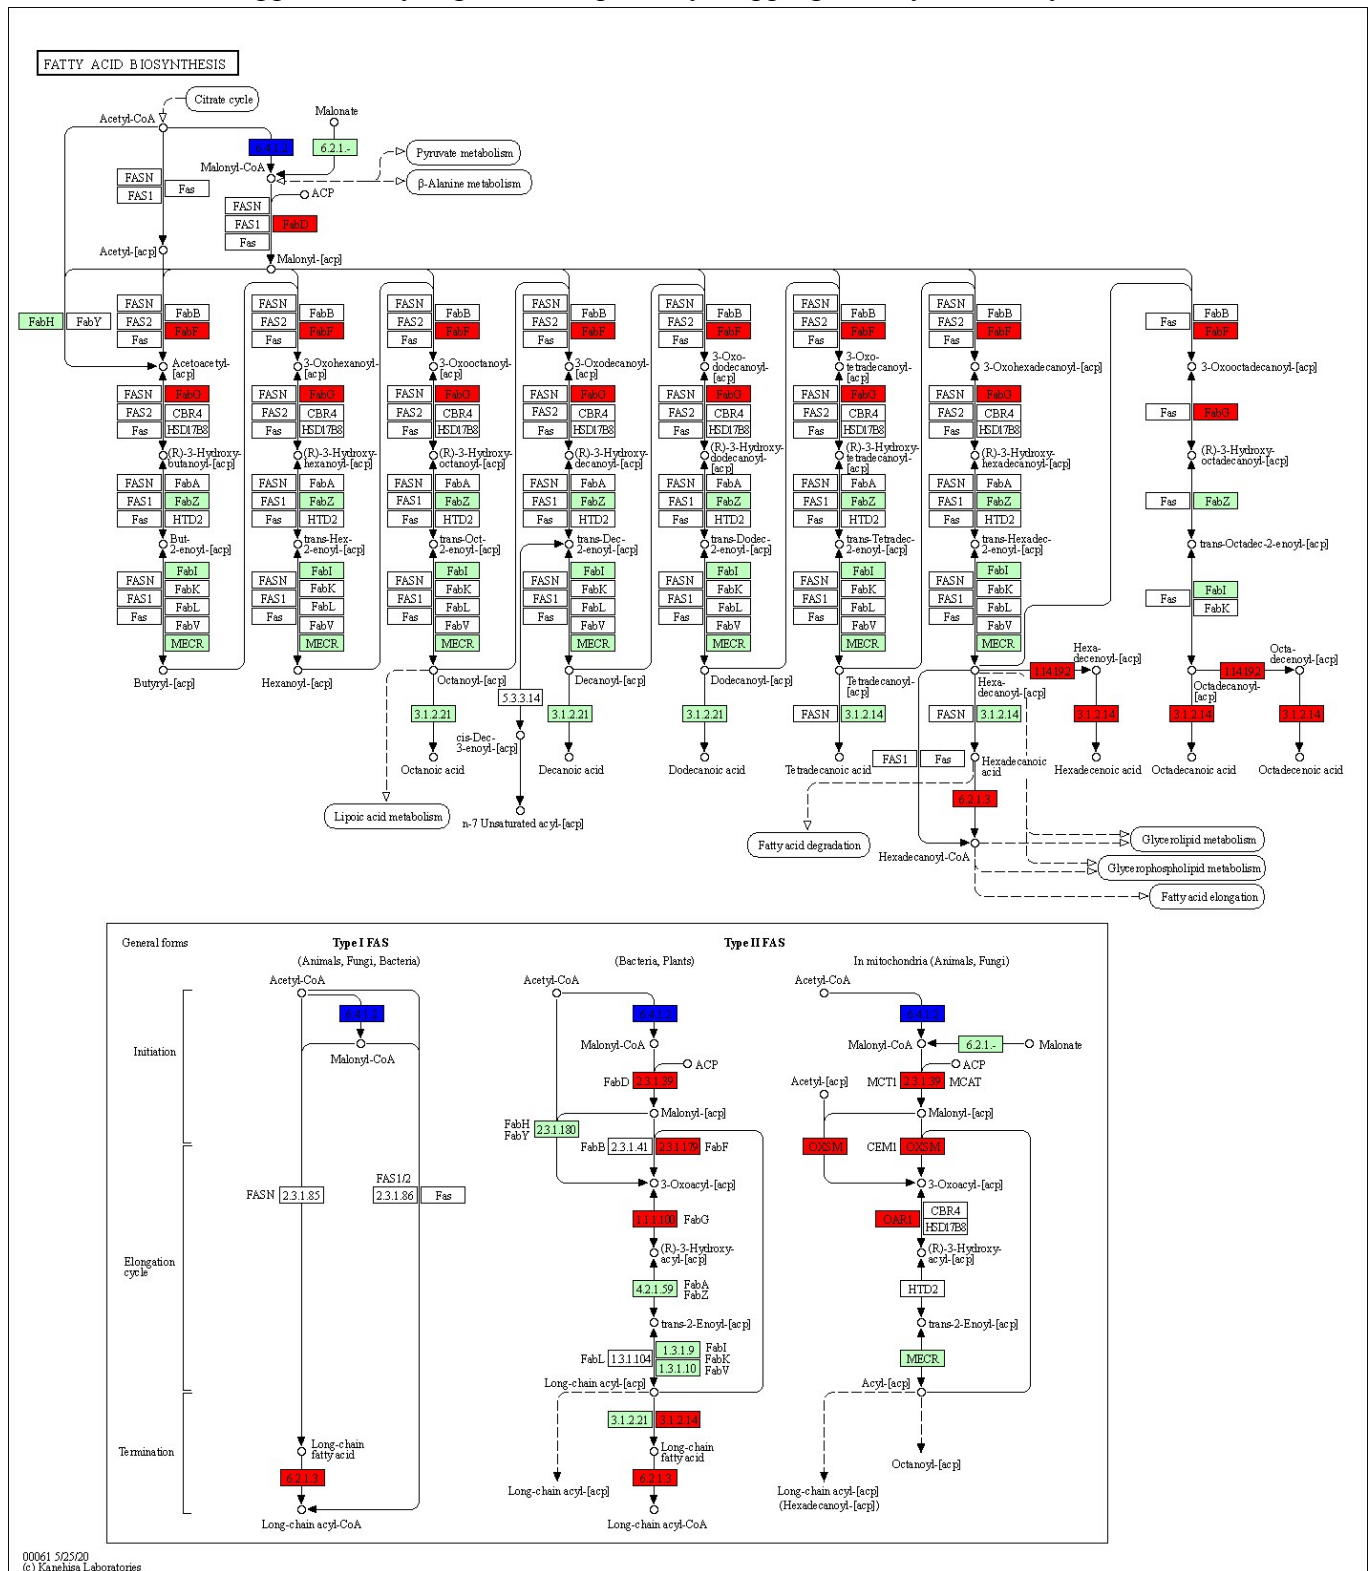

Supplementary Fig.4 KEGG pathway mapping of phenylalanine metabolism

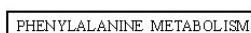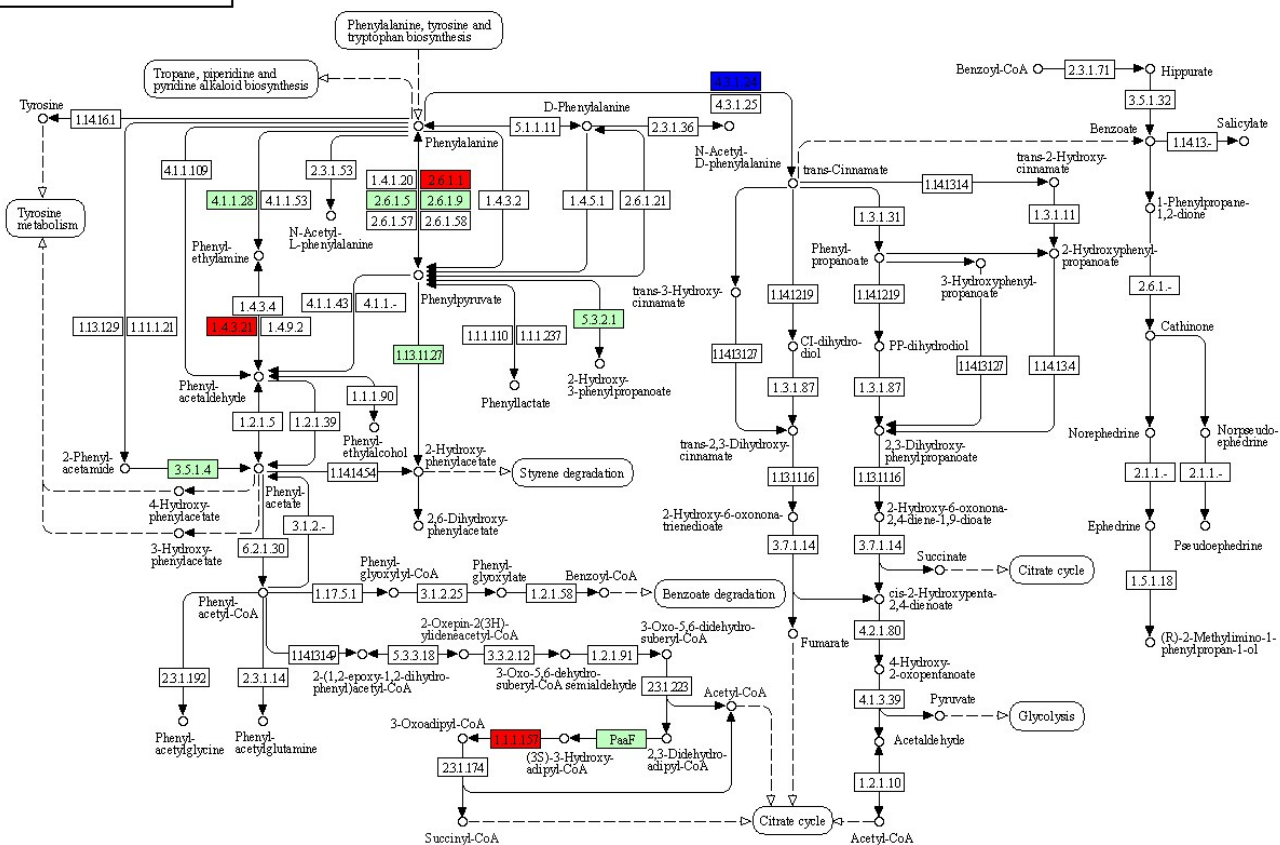

Supplementary Fig.5 KEGG pathway mapping of photosynthesis

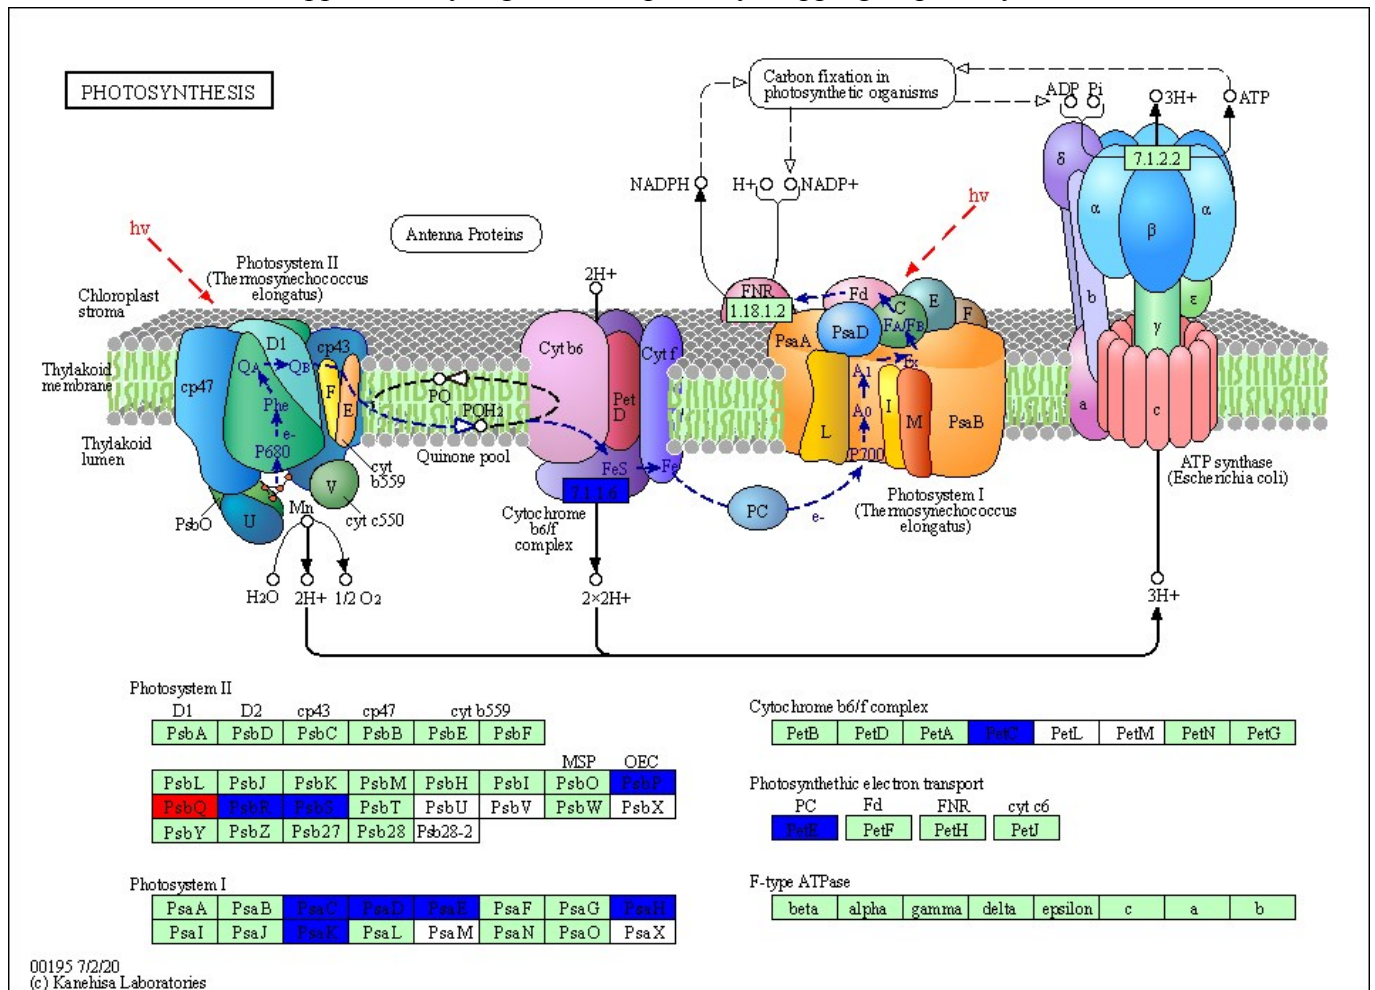

Supplementary Fig.6 KEGG pathway mapping of flavonoid biosynthesis.

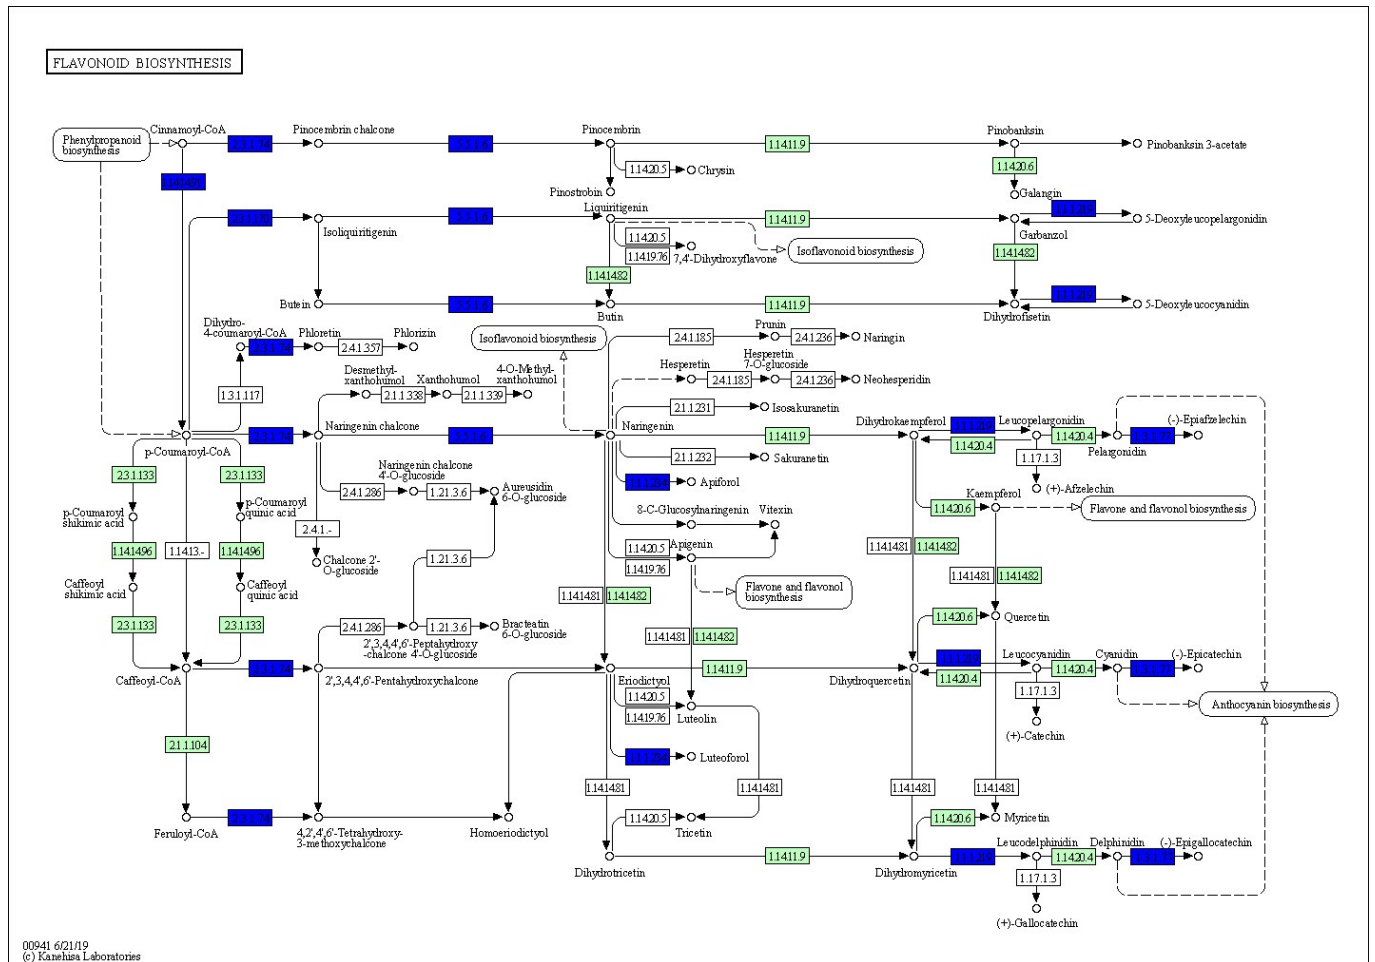



Supplementary Table 1 The top three enriched GO terms for DEPs in jujubes

| Gene Ontology term |                                   | <i>P</i> -value adjusted | count |
|--------------------|-----------------------------------|--------------------------|-------|
| 76 DAF vs 55 DAF   |                                   |                          |       |
| Biological process | single-organism metabolic process | 5.45E-22                 | 135   |
|                    | catabolic process                 | 7.02E-12                 | 62    |
|                    | response to chemical              | 1.8E-09                  | 69    |
| Cellular component | cell periphery                    | 8.37E-20                 | 74    |
|                    | plasma membrane                   | 1.56E-10                 | 49    |
|                    | apoplast                          | 7.91E-10                 | 20    |
| Molecular function | oxidoreductase activity           | 1.63E-06                 | 48    |
|                    | hydrolase activity                | 3.7E-06                  | 77    |
|                    | lyase activity                    | 0.00641                  | 14    |
| 96 DAF vs 76 DAF   |                                   |                          |       |
| Biological process | single-organism metabolic process | 1.35E-26                 | 164   |
|                    | response to abiotic stimulus      | 3.25E-15                 | 67    |
|                    | response to chemical              | 2.01E-14                 | 90    |
| Cellular component | cell periphery                    | 1.77E-19                 | 85    |
|                    | intracellular part                | 1.12E-18                 | 212   |
|                    | intracellular                     | 2.62E-16                 | 214   |
| Molecular function | oxidoreductase activity           | 7.23E-09                 | 60    |
|                    | carbohydrate transporter activity | 3.91E-04                 | 7     |
|                    | protein binding                   | 4.18E-04                 | 57    |
| 116 DAF vs 96 DAF  |                                   |                          |       |
| Biological process | response to abiotic stimulus      | 1.9E-30                  | 118   |
|                    | response to chemical              | 1.92E-25                 | 149   |
|                    | single-organism metabolic process | 1.92E-25                 | 228   |
| Cellular component | intracellular part                | 6E-40                    | 357   |
|                    | intracellular                     | 1.87E-39                 | 366   |
|                    | intracellular organelle part      | 1.09E-32                 | 188   |
| Molecular function | protein binding                   | 1.8E-16                  | 120   |
|                    | oxidoreductase activity           | 8.16E-06                 | 74    |
|                    | peroxidase activity               | 1.42E-06                 | 14    |
